# Supplementary material for: Plastome structure and adaptive evolution of Calanthe s.l. species
Source: PeerJ. 2020 Oct 13;8:e10051. doi: 10.7717/peerj.10051 (PMC7566753; doi:10.7717/peerj.10051)
Supplement: Supplemental Information 7 [file peerj-08-10051-s007.xlsx]

## Sheet: Sheet1
Table S7 Ka/Ks ratio between pairwise of species protein coding sequences in seven Calanthe s.l. species
Gene	Calanthe davidii & Other species							Styloglossum lyroglossa & Other species							Calanthe delavayi & Other species							Preptanthe ruben & Other species							Cephalantheropsis obcordata & Other species							Calanthe triplicata & Other species							Phaius tankervilliae & Other species
	davidii&lyroglossa	davidii&delavayi	davidii&rubens	davidii&obcordata	davidii&triplicata	davidii&tankervilliae	Average Mean	lyroglossa&davidii	lyroglossa&delavayi	lyroglossa&rubens	lyroglossa&obcordata	lyroglossa&triplicata	lyroglossa&tankervilliae	Average Mean	davidii&delavayi	lyroglossa&delavayi	delavayi&rubens	delavayi&obcordata	delavayi&triplicata	delavayi&tankervilliae	Average Mean	davidii&rubens	lyroglossa&rubens	delavayi&rubens	rubens&obcordata	rubens&triplicata	rubens&tankervilliae	Average Mean	davidii&obcordata	lyroglossa&obcordata	delavayi&obcordata	rubens&obcordata	obcordata&triplicata	obcordata&tankervilliae	Average Mean	triplicata&tankervilliae	davidii&triplicata	lyroglossa&triplicata	delavayi&triplicata	rubens&triplicata	obcordata&triplicata	Average Mean	davidii&tankervilliae	lyroglossa&tankervilliae	delavayi&tankervilliae	rubens&tankervilliae	obcordata&tankervilliae	triplicata&tankervilliae	Average Mean
accD	0.532883	0.594013	0.260718	0.417624	0.151014	0.383961	0.390035	0.532883	1.12709	0.292365	0.902943	0.453347	0.881347	0.698329	0.594013	1.12709	0.330582	0.390227	0.489535	0.888624	0.636679	0.260718	0.292365	0.330582	0.16584	0.201453	0.204777	0.242622	0.417624	0.902943	0.390227	0.16584	0.280793	0.297669	0.409183	0.310921	0.151014	0.453347	0.489535	0.201453	0.280793	0.314511	0.383961	0.881347	0.888624	0.204777	0.297669	0.310921	0.49455
atpA	0.178995	0.0560133	0.0955673	0.168669	0.1275	0.0502377	0.11283	0.178995	0.150069	0.27982	0.346209	0.174237	0.233689	0.22717	0.0560133	0.150069	0.0894556	0.143277	0.0554531	0.0451903	0.0899097	0.0955673	0.27982	0.0894556	0.254584	0.095492	0.0965227	0.151907	0.168669	0.346209	0.143277	0.254584	0.166128	0.287005	0.227645	0.0502004	0.1275	0.174237	0.0554531	0.095492	0.166128	0.111502	0.0502377	0.233689	0.0451903	0.0965227	0.287005	0.0502004	0.127141
atpB	0.123211	0.0760249	0.106836	0.0863484	0	0.11814	0.0850934	0.123211	0.215004	0.0648949	0.0436213	0.125237	0.0741639	0.107689	0.0760249	0.215004	0.191809	0.211097	0.0784277	0.240651	0.168836	0.106836	0.0648949	0.191809	0	0.109269	0	0.0788015	0.0863484	0.0436213	0.211097	0	0.0879363	0	0.0715005	0.121061	0	0.125237	0.0784277	0.109269	0.0879363	0.0869885	0.11814	0.0741639	0.240651	0	0	0.121061	0.092336
atpE	0.14402	0.295962	0	0.28456	0	0.101079	0.137603	0.14402	0	0	0	0	0	0.0240033	0.295962	0	0	0.0969195	0	0	0.0654803	0	0	0	0.14498	0	0	0.0241633	0.28456	0	0.0969195	0.14498	0.14498	0.0904735	0.126986	0	0	0	0	0	0.14498	0.0241633	0.101079	0	0	0	0.0904735	0	0.0319254
atpF	0.465897	0.0749288	0.545194	0.926878	0	0.936008	0.491484	0.465897	0.172359	0.570339	0	0.305823	1.06335	0.429628	0.0749288	0.172359	0.289981	0.258245	0.0672831	0.260825	0.18727	0.545194	0.570339	0.289981	0.851641	0.40151	0.431211	0.514979	0.926878	0	0.258245	0.851641	0.457324	0	0.415681	0.461936	0	0.305823	0.0672831	0.40151	0.457324	0.282313	0.936008	1.06335	0.260825	0.431211	0	0.461936	0.525555
atpH	0	0.315618	0	0	0	0	0.052603	0	0.306019	0	0	0	0	0.0510032	0.315618	0.306019	0.153495	0.309759	0.315618	0.320708	0.286869	0	0	0.153495	0	0	0	0.0255825	0	0	0.309759	0	0	0	0.0516265	0	0	0	0.315618	0	0	0.052603	0	0	0.320708	0	0	0	0.0534513
atpI	0.272962	0.0679075	0.0901521	0.204341	0	0.0905406	0.120984	0.272962	0.182506	0.272631	0.552558	0.826773	0.135719	0.373858	0.0679075	0.182506	0	0.136703	0.101981	0	0.0815162	0.0901521	0.272631	0	0.181521	0.141932	0	0.114373	0.204341	0.552558	0.136703	0.181521	0.412677	0.108434	0.266039	0.0756832	0	0.826773	0.101981	0.141932	0.412677	0.259841	0.0905406	0.135719	0	0	0.108434	0.0756832	0.0683961
ccsA	0.282272	0.131125	0.149548	0.251329	0.258566	0.240749	0.218932	0.282272	0.235161	0.380172	0.311185	0.284695	0.466134	0.326603	0.131125	0.235161	0.232987	0.335376	0.162274	0.334221	0.238524	0.149548	0.380172	0.232987	0.282897	0.184568	0.270365	0.25009	0.251329	0.311185	0.335376	0.282897	0.271093	0.439143	0.315171	0.176513	0.258566	0.284695	0.162274	0.184568	0.271093	0.222951	0.240749	0.466134	0.334221	0.270365	0.439143	0.176513	0.321188
cemA	0.937255	0.611094	0.909679	1.38582	0.586575	1.11401	0.924072	0.937255	0.37036	0.158146	1.41563	0.609794	0.447229	0.656402	0.611094	0.37036	0.396515	1.38007	0.397595	0.439669	0.599217	0.909679	0.158146	0.396515	1.29655	0.591279	0.189867	0.590339	1.38582	1.41563	1.38007	1.29655	1.35705	1.37278	1.36798	0.724029	0.586575	0.609794	0.397595	0.591279	1.35705	0.711054	1.11401	0.447229	0.439669	0.189867	1.37278	0.724029	0.714597
clpP	0.0542654	0.0444532	0.0506518	0.0380299	0	0.121436	0.0514727	0.0542654	0	0	0	zzzz	0.543654	0.119584	0.0444532	0	0	0	0.0379448	0.0735227	0.0259868	0.0506518	0	0	0	0.0447136	0.184511	0.0466461	0.0380299	0	0	0	0.0331199	0.269982	0.0568553	0.105483	0	zzzz	0.0379448	0.0447136	0.0331199	0.0442523	0.121436	0.543654	0.0735227	0.184511	0.269982	0.105483	0.216431
infA	0.0383166	0	0	0	0	0	0.0063861	0.0383166	4.13731	2.861	3.10224	3.32045	4.50115	2.99341	0	4.13731	0	0	0	0	0.689552	0	2.861	0	0	0	0	0.476833	0	3.10224	0	0	0	0	0.51704	0	0	3.32045	0	0	0	0.553408	0	4.50115	0	0	0	0	0.750192
matK	0.364319	0.440543	0.702172	0.518539	0.640141	0.343779	0.501582	0.364319	0.466921	0.691629	0.682688	0.354744	0.299169	0.476578	0.440543	0.466921	0.806566	0.629854	0.503329	0.38845	0.539277	0.702172	0.691629	0.806566	0.951104	0.744812	0.542495	0.739796	0.518539	0.682688	0.629854	0.951104	0.557773	0.49804	0.639666	0.328543	0.640141	0.354744	0.503329	0.744812	0.557773	0.521557	0.343779	0.299169	0.38845	0.542495	0.49804	0.328543	0.400079
nad6	0.162553	2.05627	0.300599	0	0	0	0.419904	0.162553	1.92897	0.499819	0.60439	0.10468	0.197804	0.583036	2.05627	1.92897	3.58017	3.65912	3.6521	3.58017	3.07613	0.300599	0.499819	3.58017	0.446252	0.295844	0	0.853781	0	0.60439	3.65912	0.446252	0	0	0.78496	0	0	0.10468	3.6521	0.295844	0	0.675437	0	0.197804	3.58017	0	0	0	0.629662
ndhA	0.146808	0.258537	0.0868758	0.124195	0.128871	0.249408	0.165782	0.146808	0.392895	0.109957	0	0.072247	0.17347	0.149229	0.258537	0.392895	0.161818	0.19532	0.258537	0.328898	0.266001	0.0868758	0.109957	0.161818	0.129792	0.0570121	0.19512	0.123429	0.124195	0	0.19532	0.129792	0.0610047	0.262314	0.128771	0.183778	0.128871	0.072247	0.258537	0.0570121	0.0610047	0.126908	0.249408	0.17347	0.328898	0.19512	0.262314	0.183778	0.232165
ndhB	0.992764	1.52387	0.661351	0.659586	0	0	0.639595	0.992764	1.38042	0.165033	0.164586	0.660754	0.330317	0.615646	1.52387	1.38042	1.29484	1.2899	1.45405	1.55848	1.41693	0.661351	0.165033	1.29484	0	0.330196	0	0.40857	0.659586	0.164586	1.2899	0	0.329309	0	0.40723	0	0	0.660754	1.45405	0.330196	0.329309	0.462385	0	0.330317	1.55848	0	0	0	0.3148
ndhD	0.127546	0.736568	0.2375	0.216015	0.243026	0.104493	0.277525	0.127546	0.326217	0.147843	0.15812	0.175063	0.069641	0.167405	0.736568	0.326217	0.491858	0.670429	0.66484	0.32358	0.535582	0.2375	0.147843	0.491858	0.299665	0.278318	0.17456	0.271624	0.216015	0.15812	0.670429	0.299665	0.188152	0.238025	0.295068	0.167778	0.243026	0.175063	0.66484	0.278318	0.188152	0.286196	0.104493	0.069641	0.32358	0.17456	0.238025	0.167778	0.179679
ndhE	0.0725687	0	0.145314	0.098157	0	0.592012	0.151342	0.0725687	0.098411	0.152049	0	0.0723831	0.0992587	0.0824451	0	0.098411	0.197038	0.149714	0	0.295169	0.123389	0.145314	0.152049	0.197038	0.30832	0.144932	0.198761	0.191069	0.098157	0	0.149714	0.30832	0.0979083	0.150967	0.134178	0.192963	0	0.0723831	0	0.144932	0.0979083	0.0846977	0.592012	0.0992587	0.295169	0.198761	0.150967	0.192963	0.254855
ndhH	0.0344947	0.42671	0.0412203	0	0	0.0655982	0.0946705	0.0344947	0.314156	0.0861565	0.125921	0.0388498	0.0967476	0.116054	0.42671	0.314156	0.26451	0.638076	0.315519	0.533445	0.415403	0.0412203	0.0861565	0.26451	0.0409623	0.0350676	0.168195	0.106019	0	0.125921	0.638076	0.0409623	0	0.0652553	0.145036	0.0628487	0	0.0388498	0.315519	0.0350676	0	0.0753808	0.0655982	0.0967476	0.533445	0.168195	0.0652553	0.0628487	0.165348
ndhI	0	0.352329	0.411142	0	0	0	0.127245	0	0.737117	0	0	0.205311	0	0.157071	0.352329	0.737117	0.737117	0.737117	0.352329	0.737117	0.608854	0.411142	0	0.737117	0.411142	0.621161	0.418897	0.433243	0	0	0.737117	0.411142	0.100992	0	0.208208	0.102919	0	0.205311	0.352329	0.621161	0.100992	0.230452	0	0	0.737117	0.418897	0	0.102919	0.209822
ndhJ	0.0574861	0.232515	0.112541	0.0778252	0	0.472169	0.158756	0.0574861	0.0903235	0.0562738	0	0.0574861	0.0769005	0.0564117	0.232515	0.0903235	0.135244	0.116229	0.232515	0.352084	0.193152	0.112541	0.0562738	0.135244	0.0454753	0.112541	0.152934	0.102502	0.0778252	0	0.116229	0.0454753	0.0778252	0.117773	0.0725213	0.472169	0	0.0574861	0.232515	0.112541	0.0778252	0.158756	0.472169	0.0769005	0.352084	0.152934	0.117773	0.472169	0.274005
petA	0.346433	0.259857	0.172889	0.274259	0.082486	0.168882	0.217468	0.346433	0.684027	0.455305	0.351166	0.219885	0.198188	0.375834	0.259857	0.684027	0.167955	0.422154	0.153168	0.157143	0.307384	0.172889	0.455305	0.167955	0.187707	0.12729	0.201386	0.218755	0.274259	0.351166	0.422154	0.187707	0.195515	0.180657	0.268576	0.123827	0.082486	0.219885	0.153168	0.12729	0.195515	0.150362	0.168882	0.198188	0.157143	0.201386	0.180657	0.123827	0.171681
petB	0.121989	0.134531	0.048301	0.149962	0	0.10808	0.0938105	0.121989	0.0397705	0.139031	0.117147	0.0968371	0.0701747	0.0974915	0.134531	0.0397705	0.0476152	0.0488141	0.133563	0	0.0673823	0.048301	0.139031	0.0476152	0.150166	0.0370522	0.0763193	0.0830808	0.149962	0.117147	0.0488141	0.150166	0.113057	0.052	0.105191	0.0815203	0	0.0968371	0.133563	0.0370522	0.113057	0.0770049	0.10808	0.0701747	0	0.0763193	0.052	0.0815203	0.0646824
petD	0	0	0.0557058	0	0	0	0.0092843	0	0	0.290844	0	0	0	0.048474	0	0	0.0814014	0	0	0	0.0135669	0.0557058	0.290844	0.0814014	0.290844	0.106044	0.290844	0.185947	0	0	0	0.290844	0	0	0.048474	0	0	0	0	0.106044	0	0.017674	0	0	0	0.290844	0	0	0.048474
petG	0	0	0	0	0	0	0	0	0	0	0	0	0	0	0	0	0	0	0	0	0	0	0	0	0	0	0	0	0	0	0	0	0	0	0	0	0	0	0	0	0	0	0	0	0	0	0	0	0
petL	0	0	0	0.230782	0	0	0.0384637	0	0	0	0	0	0	0	0	0	0	0	0	0	0	0	0	0	0	0	0	0	0.230782	0	0	0	0.230782	0	0.0769273	0	0	0	0	0	0.230782	0.0384637	0	0	0	0	0	0	0
petN	0	0	0	0.295417	0	0	0.0492362	0	0.27106	0.309879	0	0.309879	0.14733	0.173025	0	0.27106	0	0.138728	0	0	0.068298	0	0.309879	0	0.30417	0	0	0.102342	0.295417	0	0.138728	0.30417	0.30417	0.144525	0.197835	0	0	0.309879	0	0	0.30417	0.102342	0	0.14733	0	0	0.144525	0	0.0486425
psaA	0.111819	0.243416	0.106941	0.10221	0.306133	0.117738	0.16471	0.111819	0.0572163	0.0451559	0	0.0522545	0.0732351	0.0566135	0.243416	0.0572163	0.107631	0.056388	0.168014	0.170179	0.133807	0.106941	0.0451559	0.107631	0.0524381	0.0535858	0.0848587	0.0751017	0.10221	0	0.056388	0.0524381	0.0460314	0.0761549	0.0555371	0.0393221	0.306133	0.0522545	0.168014	0.0535858	0.0460314	0.11089	0.117738	0.0732351	0.170179	0.0848587	0.0761549	0.0393221	0.0935813
psaB	0.135279	0.281379	0.0552495	0.11316	0.423785	0.0600636	0.178153	0.135279	0.0339506	0.0826509	0.144469	0.177432	0.0724053	0.107698	0.281379	0.0339506	0.0318827	0.0308571	0.376719	0.0396158	0.132401	0.0552495	0.0826509	0.0318827	0.0689092	0.0870006	0.0284207	0.0590189	0.11316	0.144469	0.0308571	0.0689092	0.148012	0.0504493	0.0926428	0.0853613	0.423785	0.177432	0.376719	0.0870006	0.148012	0.216385	0.0600636	0.0724053	0.0396158	0.0284207	0.0504493	0.0853613	0.0560527
psaC	0	0	0	0	0	0	0	0	0	0	0	0	0	0	0	0	0	0	0	0	0	0	0	0	0	0	0	0	0	0	0	0	0	0	0	0	0	0	0	0	0	0	0	0	0	0	0	0	0
psaI	0	0	0	0	0	0	0	0	0	0	0	0	0	0	0	0	0	0	0.368039	0	0.0613398	0	0	0	0	0	0	0	0	0	0	0	0	0	0	0	0	0	0.368039	0	0	0.0613398	0	0	0	0	0	0	0
psaJ	0	0	0	0	0.189202	0	0.0315337	0	0	0	0	0	0	0	0	0	0	0	0	0	0	0	0	0	0	0.406512	0	0.067752	0	0	0	0	0	0	0	0	0.189202	0	0	0.406512	0	0.0992857	0	0	0	0	0	0	0
psbA	0.0254739	0	0	0	0.0922644	0	0.019623	0.0254739	0.0341866	0.0371197	0.0698935	0.04267	0.0557343	0.0441797	0	0.0341866	0	0	0.0363669	0	0.0117589	0	0.0371197	0	0	0.0200495	0	0.0095282	0	0.0698935	0	0	0.0237266	0	0.0156034	0.0281119	0.0922644	0.04267	0.0363669	0.0200495	0.0237266	0.0405315	0	0.0557343	0	0	0	0.0281119	0.0139744
psbB	0	0	0	0.0543509	0.614621	0	0.111495	0	0	0	0.154666	0.0522797	0	0.0344909	0	0	0	0.0554305	0.0708221	0	0.0210421	0	0	0	0.0796094	0.117417	0	0.0328377	0.0543509	0.154666	0.0554305	0.0796094	0.115553	0.0523985	0.0853347	0.0614645	0.614621	0.0522797	0.0708221	0.117417	0.115553	0.172026	0	0	0	0	0.0523985	0.0614645	0.0189772
psbC	0.161147	0.0557979	0.0420676	0.0480814	0.0674275	0.0421079	0.0694382	0.161147	0.134778	0.135976	0.16999	0.0841829	0.136104	0.13703	0.0557979	0.134778	0	0	0	0	0.0317627	0.0420676	0.135976	0	0	0	0	0.0296739	0.0480814	0.16999	0	0	0	0	0.0363452	0	0.0674275	0.0841829	0	0	0	0.0252684	0.0421079	0.136104	0	0	0	0	0.029702
psbD	0.0936054	0	0	0	0.282127	0	0.0626221	0.0936054	0.0394081	0.14476	0.09289	0.172083	0.0933934	0.106023	0	0.0394081	0	0	0.0679139	0	0.017887	0	0.14476	0	0	0.0722477	0	0.0361679	0	0.09289	0	0	0.0639221	0	0.0261354	0.0683104	0.282127	0.172083	0.0679139	0.0722477	0.0639221	0.121101	0	0.0933934	0	0	0	0.0683104	0.0269506
psbE	0	0	0	0	0	0	0	0	0	0	0	0	0	0	0	0	0	0	0	0	0	0	0	0	0	0	0	0	0	0	0	0	0	0	0	0	0	0	0	0	0	0	0	0	0	0	0	0	0
psbF	0	0	0	0	0	0	0	0	0	0	0	0	0	0	0	0	0	0.354	0	0	0.059	0	0	0	0	0	0	0	0	0	0.354	0	0	0	0.059	0	0	0	0	0	0	0	0	0	0	0	0	0	0
psbH	0	0.112913	0.112913	0.112913	0	0.112913	0.0752753	0	0	0	0	0	0	0	0.112913	0	0	0	0	0	0.0188188	0.112913	0	0	0	0	0	0.0188188	0.112913	0	0	0	0	0	0.0188188	0	0	0	0	0	0	0	0.112913	0	0	0	0	0	0.0188188
psbI	0	0	0	0	0	0	0	0	0	0	0	0	0	0	0	0	0	0	0	0	0	0	0	0	0	0	0	0	0	0	0	0	0	0	0	0	0	0	0	0	0	0	0	0	0	0	0	0	0
psbJ	0	0	0	0	0	0	0	0	0	0	0	0	0	0	0	0	0	0	0	0	0	0	0	0	0	0	0	0	0	0	0	0	0	0	0	0	0	0	0	0	0	0	0	0	0	0	0	0	0
psbK	0.151452	0	0.298757	0.151452	0.294284	0.151452	0.174566	0.151452	0.0868228	0.312553	0	0.183487	0	0.122386	0	0.0868228	0.180146	0.0868228	0.0925705	0.0868228	0.0888642	0.298757	0.312553	0.180146	0.312553	0.293582	0.312553	0.285024	0.151452	0	0.0868228	0.312553	0.183487	0	0.122386	0.183487	0.294284	0.183487	0.0925705	0.293582	0.183487	0.20515	0.151452	0	0.0868228	0.312553	0	0.183487	0.122386
psbL	0	0	0	0	0	0	0	0	0	0	0	0	0	0	0	0	0	0	0	0	0	0	0	0	0	0	0	0	0	0	0	0	0	0	0	0	0	0	0	0	0	0	0	0	0	0	0	0	0
psbM	0	0	0	0	0.372292	0	0.0620487	0	0	0	0	0.363235	0	0.0605392	0	0	0	0	0.18596	0	0.0309933	0	0	0	0	0	0	0	0	0	0	0	0	0	0	0.371227	0.372292	0.363235	0.18596	0	0	0.215452	0	0	0	0	0	0.371227	0.0618712
psbN	0	0	0	0	0	0	0	0	0	0	0	0	0	0	0	0	0	0	0	0	0	0	0	0	0	0	0	0	0	0	0	0	0	0	0	0	0	0	0	0	0	0	0	0	0	0	0	0	0
psbT	0	0	0	0	0	0	0	0	0	0	0	0	0	0	0	0	0	0	0	0	0	0	0	0	0	0	0	0	0	0	0	0	0	0	0	0	0	0	0	0	0	0	0	0	0	0	0	0	0
psbZ	0	0	0	0	0	0	0	0	0	0	0	0	0	0	0	0	0	0	0	0	0	0	0	0	0	0	0.305604	0.050934	0	0	0	0	0	0.296423	0.0494038	0	0	0	0	0	0	0	0	0	0	0.305604	0.296423	0	0.100338
rbcL	0.0903148	0.227291	0.286475	0.245686	0.364589	0.50484	0.286533	0.0903148	0.113702	0.0736617	0.203758	0.136778	0.157933	0.129358	0.227291	0.113702	0.0844442	0.120037	0.436562	0.398882	0.230153	0.286475	0.0736617	0.0844442	0.0752647	0.485048	0.164411	0.194884	0.245686	0.203758	0.120037	0.0752647	0.384319	0.156255	0.197553	0.892693	0.364589	0.136778	0.436562	0.485048	0.384319	0.449998	0.50484	0.157933	0.398882	0.164411	0.156255	0.892693	0.379169
rpl14	0	0	0	0	0	0.252453	0.0420755	0	0	0	0	0	0.120399	0.0200665	0	0	0	0	0	0.0812506	0.0135418	0	0	0	0	0	0.126975	0.0211625	0	0	0	0	0	0.246345	0.0410575	0.249838	0	0	0	0	0	0.0416397	0.252453	0.120399	0.0812506	0.126975	0.246345	0.249838	0.179543
rpl16	0.124971	0.122944	0	0.25599	0	0.25599	0.126649	0.124971	0.123757	0.252746	0.169361	0.252746	0.169361	0.182157	0.122944	0.123757	0	0	0	0	0.0411168	0	0.252746	0	0	0	0	0.0421243	0.25599	0.169361	0	0	0	0	0.0708918	0	0	0.252746	0	0	0	0.0421243	0.25599	0.169361	0	0	0	0	0.0708918
rpl20	0.470863	0.333252	0	0.289146	0	0	0.18221	0.470863	0.0450232	0.0939111	0.110219	0.284967	0.0939111	0.183149	0.333252	0.0450232	0	0.0389735	0.191035	0	0.101381	0	0.0939111	0	0.071111	0	0	0.0275037	0.289146	0.110219	0.0389735	0.071111	0.247745	0.071111	0.138051	0	0	0.284967	0.191035	0	0.247745	0.120624	0	0.0939111	0	0	0.071111	0	0.0275037
rpl22	0.411881	0.418828	0.331647	0.821588	0.0574548	0.423975	0.410896	0.411881	0.586151	0.328925	0.188467	0.242877	0.189378	0.324613	0.418828	0.586151	0.495663	0.594123	0.24871	0.597212	0.490115	0.331647	0.328925	0.495663	0.329969	0.208327	0.331434	0.337661	0.821588	0.188467	0.594123	0.329969	0.286759	0.182073	0.400496	0.251736	0.0574548	0.242877	0.24871	0.208327	0.286759	0.215977	0.423975	0.189378	0.597212	0.331434	0.182073	0.251736	0.329301
rpl23	0	0	0	0	0	0	0	0	0	0	0	0	0	0	0	0	0	0	0	0	0	0	0	0	0	0	0	0	0	0	0	0	0	0	0	0	0	0	0	0	0	0	0	0	0	0	0	0	0
rpl2	0	0	0	0	0	0	0	0	0	0	0	0	0	0	0	0	0	0.308983	0.311177	0	0.10336	0	0	0	0	0	0	0	0	0	0.308983	0	0	0	0.0514972	0	0	0	0.311177	0	0	0.0518628	0	0	0	0	0	0	0
rpl32	0	0	0	0	0	0	0	0	0	0.18938	0	0	0	0.0315633	0	0	0	0	0	0	0	0	0.18938	0	0.203352	0	0.187176	0.0966513	0	0	0	0.203352	0	0	0.033892	0	0	0	0	0	0	0	0	0	0	0.187176	0	0	0.031196
rpl33	0.258745	0	0	0	0	0	0.0431242	0.258745	0.517831	0.258745	0.124698	0.258745	0.0593281	0.246349	0	0.517831	0	0.241408	0	0.0771282	0.139395	0	0.258745	0	0	0	0	0.0431242	0	0.124698	0.241408	0	0	0	0.0610177	0	0	0.258745	0	0	0	0.0431242	0	0.0593281	0.0771282	0	0	0	0.0227427
rpl36	0	0	0	0	0	0	0	0	0	0	0	0	0	0	0	0	0	0	0	0	0	0	0	0	0	0	0	0	0	0	0	0	0	0	0	0	0	0	0	0	0	0	0	0	0	0	0	0	0
rpoA	0.411241	0.414822	0.429995	0.644633	0.245017	0.30653	0.408706	0.411241	0.335879	0.681474	0.70803	0.111231	0.485451	0.455551	0.414822	0.335879	0.448214	0.488785	0.12986	0.303077	0.35344	0.429995	0.681474	0.448214	0.969224	0.175584	0.399651	0.517357	0.644633	0.70803	0.488785	0.969224	0.189304	0.786807	0.631131	0.0657522	0.245017	0.111231	0.12986	0.175584	0.189304	0.152791	0.30653	0.485451	0.303077	0.399651	0.786807	0.0657522	0.391211
rpoB	0.164177	0.13577	0.192296	0.122655	0.0933344	0.0821037	0.131723	0.164177	0.179711	0.441796	0.135346	0.113296	0.118241	0.192095	0.13577	0.179711	0.192023	0.146732	0.10199	0.110909	0.144522	0.192296	0.441796	0.192023	0.254678	0.140509	0.15264	0.22899	0.122655	0.135346	0.146732	0.254678	0.089437	0.099786	0.141439	0.0586479	0.0933344	0.113296	0.10199	0.140509	0.089437	0.0995357	0.0821037	0.118241	0.110909	0.15264	0.099786	0.0586479	0.103721
rpoC1	0.203629	0.276914	0.308474	0.265032	0.0768397	0.232822	0.227285	0.203629	0.180488	0.126164	0.239822	0.157587	0.104464	0.168692	0.276914	0.180488	0.217038	0.284253	0.200185	0.128252	0.214522	0.308474	0.126164	0.217038	0.265325	0.204834	0.154036	0.212645	0.265032	0.239822	0.284253	0.265325	0.197848	0.239857	0.24869	0.180728	0.0768397	0.157587	0.200185	0.204834	0.197848	0.16967	0.232822	0.104464	0.128252	0.154036	0.239857	0.180728	0.17336
rpoC2	0.260964	0.290468	0.348525	0.322541	0.127531	0.308835	0.276477	0.260964	0.504273	0.521395	0.683698	0.30299	0.529105	0.467071	0.290468	0.504273	0.54869	0.696718	0.342734	0.528854	0.485289	0.348525	0.521395	0.54869	0.695305	0.365026	0.705513	0.530742	0.322541	0.683698	0.696718	0.695305	0.372699	0.991541	0.627084	0.356311	0.127531	0.30299	0.342734	0.365026	0.372699	0.311215	0.308835	0.529105	0.528854	0.705513	0.991541	0.356311	0.570026
rps11	0.0469802	0.0588401	0.0470133	0.0380169	0	0.0293143	0.0366941	0.0469802	0	0	0	0.0847084	0	0.0219481	0.0588401	0	0	0	0.126379	0	0.0308699	0.0470133	0	0	0	0.0847744	0	0.0219646	0.0380169	0	0	0	0.0623716	0	0.0167314	0.0398263	0	0.0847084	0.126379	0.0847744	0.0623716	0.0663433	0.0293143	0	0	0	0	0.0398263	0.0115234
rps12	0	0	0	0	0	0	0	0	0	0	0	0	0	0	0	0	0	0	0	0	0	0	0	0	0	0	0	0	0	0	0	0	0	0	0	0	0	0	0	0	0	0	0	0	0	0	0	0	0
rps14	0	0	0	0.136215	0	0	0.0227025	0	0	0	0.136215	0	0	0.0227025	0	0	0.272586	0.272177	0	0.271624	0.136065	0	0	0.272586	0.273086	0.278415	0	0.137348	0.136215	0.136215	0.272177	0.273086	0.0907317	0.269283	0.196285	0.277423	0	0	0	0.278415	0.0907317	0.107762	0	0	0.271624	0	0.269283	0.277423	0.136388
rps15	0.395556	0.934422	0.247627	0.466248	0.512351	0.94243	0.583106	0.395556	0.767896	0.248148	1.2722	1.2573	0.771079	0.785363	0.934422	0.767896	0.253878	0.669582	0	0	0.43763	0.247627	0.248148	0.253878	0.297553	0.508682	0.254266	0.301692	0.466248	1.2722	0.669582	0.297553	0.894915	0.675158	0.712609	0	0.512351	1.2573	0	0.508682	0.894915	0.528875	0.94243	0.771079	0	0.254266	0.675158	0	0.440489
rps16	0.379078	0.0918952	1.14059	0.589688	0.0919086	0.382752	0.445985	0.379078	0.178672	0	0	0.178015	0	0.122628	0.0918952	0.178672	0	0.378878	0	0.362691	0.168689	1.14059	0	0	0	0.890693	0	0.338547	0.589688	0	0.378878	0	0.379786	0	0.224725	0.361594	0.0919086	0.178015	0	0.890693	0.379786	0.316999	0.382752	0	0.362691	0	0	0.361594	0.184506
rps18	0.387839	0.249283	0.266071	0.265728	1.06497	0	0.372315	0.387839	0.0945408	0.168867	0.519219	0.257616	0.667155	0.349206	0.249283	0.0945408	0.121868	0.121674	0.183544	0.420998	0.198651	0.266071	0.168867	0.121868	0	0.392826	0.539554	0.248198	0.265728	0.519219	0.121674	0	0.403171	0.538879	0.308112	1.70418	1.06497	0.257616	0.183544	0.392826	0.403171	0.667718	0	0.667155	0.420998	0.539554	0.538879	1.70418	0.645128
rps19	0	0	0	0	0	0	0	0	0	0	0	0	0	0	0	0	0	0	0	0	0	0	0	0	0	0	0	0	0	0	0	0	0	0	0	0	0	0	0	0	0	0	0	0	0	0	0	0	0
rps2	0.0416852	0.0677428	0.0860341	0.0937247	0	0.121591	0.068463	0.0416852	0.239229	0.204862	0.127248	0.0354377	0.523509	0.195328	0.0677428	0.239229	0.205348	0.360365	0.0538596	0.472615	0.233193	0.0860341	0.204862	0.205348	0.281451	0.0769652	0.298509	0.192195	0.0937247	0.127248	0.360365	0.281451	0.0798985	0.689773	0.272077	0.103481	0	0.0354377	0.0538596	0.0769652	0.0798985	0.0582737	0.121591	0.523509	0.472615	0.298509	0.689773	0.103481	0.368246
rps3	0.154304	0.113145	0.265488	0.252052	0.0446487	0.213267	0.173817	0.154304	0.306416	0.389039	0.12288	0.136377	0.3031	0.235353	0.113145	0.306416	0.373732	0.406181	0.109496	0.541768	0.308456	0.265488	0.389039	0.373732	0.418793	0.17206	0.338298	0.326235	0.252052	0.12288	0.406181	0.418793	0.161902	0.464792	0.304433	0.164021	0.0446487	0.136377	0.109496	0.17206	0.161902	0.131417	0.213267	0.3031	0.541768	0.338298	0.464792	0.164021	0.337541
rps4	0.188206	0.141437	0.570608	0.0940288	0.28096	0.285798	0.260173	0.188206	0.0946864	0.287043	0	0.209498	0.190604	0.161673	0.141437	0.0946864	0.287064	0	0.187172	0.143757	0.142353	0.570608	0.287043	0.287064	0.143411	0.424667	0.577554	0.381725	0.0940288	0	0	0.143411	0.139598	0.0955864	0.0787707	0.283686	0.28096	0.209498	0.187172	0.424667	0.139598	0.254263	0.285798	0.190604	0.143757	0.577554	0.0955864	0.283686	0.262831
rps7	0	0	0	0	0	0	0	0	0	0	0	0	0	0	0	0	0	0	0	0	0	0	0	0	0	0	0	0	0	0	0	0	0	0	0	0	0	0	0	0	0	0	0	0	0	0	0	0	0
rps8	0.25293	0.177571	0.39251	0	0	0.253409	0.179403	0.25293	0.127055	0.241271	0.0880629	0.185595	0.254209	0.19152	0.177571	0.127055	0.120208	0.177645	0.126253	0.127936	0.142778	0.39251	0.241271	0.120208	0.362083	0.245957	0.240924	0.267159	0	0.0880629	0.177645	0.362083	0.318226	0.266891	0.202151	0.187458	0	0.185595	0.126253	0.245957	0.318226	0.177248	0.253409	0.254209	0.127936	0.240924	0.266891	0.187458	0.221804
ycf1	1.26715	0.500222	0.609029	0.749326	0.536151	0.558666	0.703424	1.26715	0.995518	1.36281	1.58345	1.19204	1.16969	1.26178	0.500222	0.995518	0.656896	0.781411	0.411027	0.483985	0.638177	0.609029	1.36281	0.656896	0.759415	0.548937	0.569692	0.75113	0.749326	1.58345	0.781411	0.759415	0.658323	0.595141	0.854511	0.606252	0.536151	1.19204	0.411027	0.548937	0.658323	0.658788	0.558666	1.16969	0.483985	0.569692	0.595141	0.606252	0.663904
ycf2	1.3128	0.793119	0.875211	0.852178	0.395013	0.841702	0.845004	1.3128	1.27408	1.06115	1.10198	0.827445	0.954424	1.08865	0.793119	1.27408	1.05512	0.955507	0.628163	0.819342	0.920888	0.875211	1.06115	1.05512	0.937666	0.729373	0.678726	0.889541	0.852178	1.10198	0.955507	0.937666	0.682781	0.739577	0.878282	0.507709	0.395013	0.827445	0.628163	0.729373	0.682781	0.628414	0.841702	0.954424	0.819342	0.678726	0.739577	0.507709	0.756913
ycf3	0	0	0.233497	0.231689	0	0.233193	0.116396	0	0.233093	0	0	0	0	0.0388488	0	0.233093	0.467659	0.45978	0	0.462838	0.270562	0.233497	0	0.467659	0	0.233497	0	0.155776	0.231689	0	0.45978	0	0.231689	0	0.15386	0.233193	0	0	0	0.233497	0.231689	0.116396	0.233193	0	0.462838	0	0	0.233193	0.154871
ycf4	0.297082	0.0591835	0.368683	0.300998	0.147775	0.073665	0.207898	0.297082	0.242037	0.550567	0.764444	0.268532	0.308296	0.40516	0.0591835	0.242037	0.29647	0.243935	0.101043	0.0990798	0.173625	0.368683	0.550567	0.29647	0.60238	0.323836	0.305493	0.407905	0.300998	0.764444	0.243935	0.60238	0.277402	0.226354	0.402585	0.110763	0.147775	0.268532	0.101043	0.323836	0.277402	0.204892	0.073665	0.308296	0.0990798	0.305493	0.226354	0.110763	0.187275
[truncated: 1 more columns]
